# Supplementary material for: Bright light improves sleep in patients with Parkinson’s disease: possible role of circadian restoration
Source: PubMed Central journal article supplement (PMC7224174; doi:10.1038/s41598-020-64645-6), 2020-05-14
Supplement: 41598_2020_64645_MOESM1_ESM.pdf [file 41598_2020_64645_MOESM1_ESM.pdf]

Supplementary information

## **Bright light improves sleep in patients with Parkinson's disease: possible role of circadian restoration**

**Takuyuki Endo<sup>a</sup>, Ritsuko Matsumura<sup>b</sup>, Isao Tokuda<sup>c</sup>, Tomoko Yoshikawa<sup>d</sup>, Yasufumi Shigeyoshi<sup>d</sup>,  
Koichi Node<sup>e</sup>, Saburo Sakoda<sup>a,f</sup> and Makoto Akashi<sup>b\*</sup>**

a) Department of Neurology, Osaka Toneyama Medical Center, 5-1-1 Toneyama, Toyonaka, Osaka 560-8552, Japan

b) The Research Institute for Time Studies, Yamaguchi University, 1677-1 Yoshida, Yamaguchi, Yamaguchi 753-8511, Japan

c) Department of Mechanical Engineering, Ritsumeikan University, 1-1-1 Nojihigashi, Kusatsu, Shiga 525-8577, Japan

d) Department of Anatomy and Neurobiology, Kindai University, 377-2 Ohno-Higashi, Osaka-Sayama, Osaka 589-8511, Japan

e) Department of Cardiovascular Medicine, Saga University, 5-1-1 Nabeshima, Saga, Saga 849-8501, Japan

f) Organic Clinic, 3-1-57 honmachi, Toyonaka, Osaka 560-0021, Japan

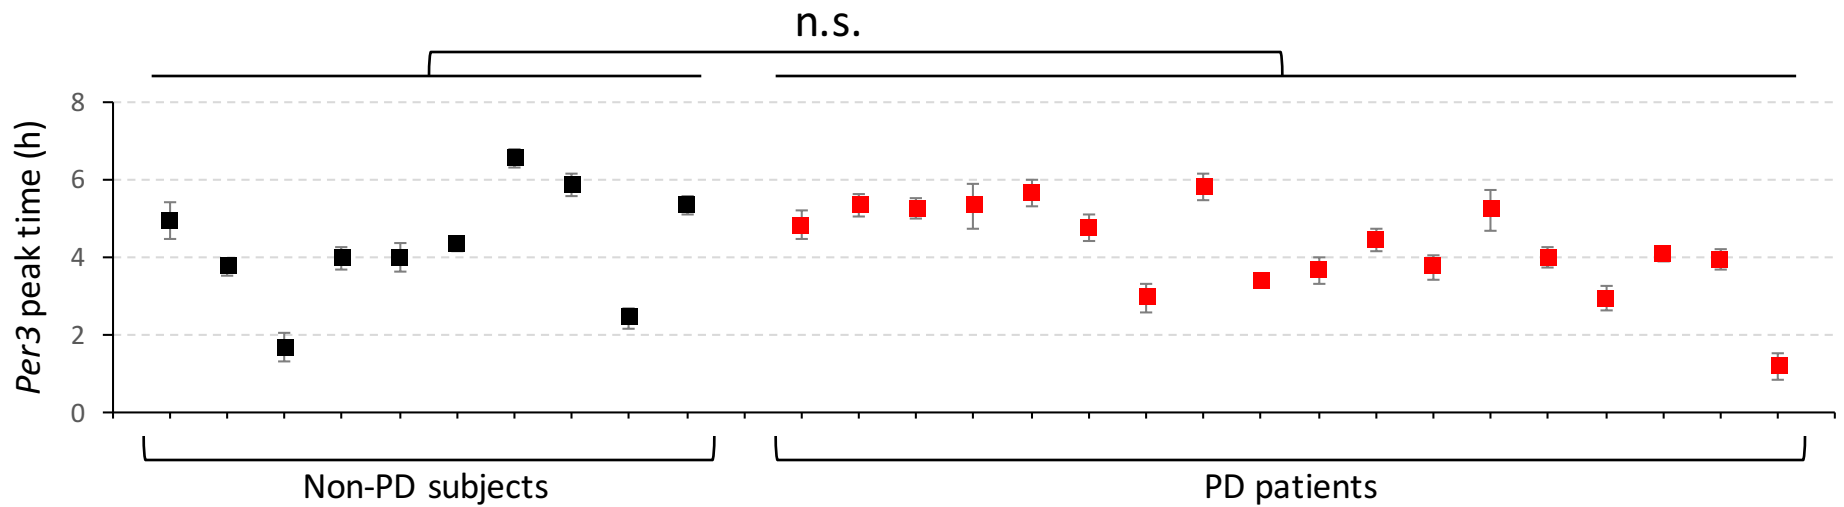

**Figure S1 Comparison of peripheral circadian phase between non-PD and PD subjects**

The estimated peak time of *Per3* expression in hair follicles was compared between 10 non-PD elderly subjects (black squares; age,  $71.4 \pm 7.4$ ; sex, male 40%) and 18 PD patients (red squares; age,  $66.2 \pm 7.5$ ; sex, male 33.3%). Error bars indicate 95% confidence intervals. n.s. represents no statistical significance between the two groups.
